# Supplementary material
Source: Frontiers journal article supplement (https://www.frontiersin.org/articles/1604108)
Supplement: Supplementary_file_1.docx [file Supplementary_file_1.docx]

**The (Dis-)Connection Between Sports and Business Literature – A Citation Network Analysis**

Supplementary material

# Table S1. Top 10 Articles referenced within and between Sports and Business Literature

| **Top 10 cited sports article** | **# citations** |
| --- | --- |
| Vaeyens R, Lenoir M, Williams AM, Philippaerts RM. Talent identification and development programmes in sport. Sports Medicine. 2008;38(9):703–14. | 130(1,264) |
| Williams AM. Perceptual skill in soccer: Implications for talent identification and development. Journal of sport sciences [Internet]. 2000;18(9):737–50. Available from: http://www.tandf.co.uk/journals | 87(726) |
| Vaeyens R, Malina RM, Janssens M, van Renterghem B, Bourgois J, Vrijens J, et al. A multidisciplinary selection model for youth soccer: The Ghent Youth Soccer Project. British Journal of Sports Medicine. 2006 Nov;40(11):928–34. | 60(693) |
| Pearson DT, Naughton GA, Torode M. Predictability of physiological testing and the role of maturation in talent identification for adolescent team sports. Journal of Science and Medicine in Sport. 2006 Aug;9(4):277–87. | 45(468) |
| Abbott A, Collins D. Eliminating the dichotomy between theory and practice in talent identification and development: Considering the role of psychology. Journal of Sports Sciences. 2004;22(5):395–408. | 38(879) |
| Meylan C, Cronin J, Oliver J, Hughes M. Talent Identification in Soccer: The Role of Maturity Status on Physical, Physiological and Technical Characteristics. International Journal of Sports Science & Coaching. 2010;5(4):571–92. | 35 (421) |
| Johnston K, Wattie N, Schorer J, Baker J. Talent identification in sport: A systematic review. Sports Med. 2018;48(1):97-109. doi:10.1007/s40279-017-0803-2 | 28(364) |
| Hoare GD, Warr CR. Talent identification and women’s soccer: An Australian experience. Journal of Sports Sciences. 2000 Jan;18(9):751–8. | 25(324) |
| Sherar LB, Baxter-Jones ADG, Faulkner RA, Russell KW. Do physical maturity and birth date predict talent in male youth ice hockey players? Journal of Sports Sciences. 2007;25(8):879-886. doi:10.1080/02640410600908001 | 25(432) |
| Vandendriessche JB, Vaeyens R, Vandorpe B, Lenoir M, Lefevre J, Philippaerts RM. Biological maturation, morphology, fitness, and motor coordination as part of a selection strategy in the search for international youth soccer players (age 15–16 years). Journal of Sports Sciences. 2012;30(15):1695-1703. doi:10.1080/02640414.2011.652654 | 24(267) |
| **Top 10 cited business article** | **# citations** |
| Arthur W, Day EA, Mcnelly TL, Edens PS. A meta-analysis of the criterion-related validity of assesment center dimensions. Personnel Psychology. 2003;56(1):125-153. doi:10.1111/j.1744-6570.2003.tb00146.x | 56(624) |
| Spychalski AC, Quiñones MA, Gaugler BB, Pohley K. A survey of assessment center üractices in organizations in the united states. Personnel Psychology. 1997;50(1):71-90. doi:10.1111/j.1744-6570.1997.tb00901.x | 44(309) |
| Klimoski R, Brickner M. Why do assessment centers work? The puzzle of assessment center validity. Personnel Psychology. 1987;40(2):243-260. doi:10.1111/j.1744-6570.1987.tb00603.x | 41(338) |
| Lance CE, Foster MR, Gentry WA, Thoresen JD. Assessor cognitive processes in an operational assessment center. Journal of Applied Psychology. 2004;89(1):22-35. doi:10.1037/0021-9010.89.1.22 | 38(106) |
| Cable DM, Judge TA. Interviewers’ perceptions of person–organization fit and organizational selection decisions. Journal of Applied Psychology. 1997;82(4):546-561. doi:10.1037/0021-9010.82.4.546 | 37(1284) |
| Woehr DJ, Arthur W. The Construct-Related Validity of Assessment Center Ratings: A Review and Meta-Analysis of the Role of Methodological Factors. Journal of Management. 2003;29(2):231-258. doi:10.1177/014920630302900206 | 31(241) |
| Lievens F, Chasteen CS, Day EA, Christiansen ND. Large-scale investigation of the role of trait activation theory for understanding assessment center convergent and discriminant validity. Journal of Applied Psychology. 2006;91(2):247-258. doi:10.1037/0021-9010.91.2.247 | 29(268) |
| Huffcutt AI, Conway JM, Roth PL, Stone NJ. Identification and meta-analytic assessment of psychological constructs measured in employment interviews. Journal of Applied Psychology. 2001;86(5):897-913. doi:10.1037/0021-9010.86.5.897 | 29 (646) |
| Kristof‐Brown AL. Perceived applicant fit: Distinguishing between recruiters’ perceptions of person–job and person–organization fit. Personnel Psychology. 2000;53(3):643-671. doi:10.1111/j.1744-6570.2000.tb00217.x | 28(993) |
| Lievens F. Factors which improve the construct validity of assessment centers: A review. Int J Selection Assessment. 1998;6(3):141-152. doi:10.1111/1468-2389.00085 | 27(197) |
| **Business paper cited in sport literature** | **# citations** |
| Nijs S, Gallardo-Gallardo E, Dries N, Sels L. A multidisciplinary review into the definition, operationalization, and measurement of talent. Journal of World Business. 2014;49(2):180-191. doi:10.1016/j.jwb.2013.11.002 | 1 |
| Robertson IT, Smith M. Personnel selection. J Occupat & Organ Psyc. 2001;74(4):441-472. doi:10.1348/096317901167479 | 1 |
| Lievens F, Patterson F. The validity and incremental validity of knowledge tests, low-fidelity simulations, and high-fidelity simulations for predicting job performance in advanced-level high-stakes selection. Journal of Applied Psychology. 2011;96(5):927-940. doi:10.1037/a0023496 | 1 |
| **Sport paper cited in business literature** | **# citations** |
| Blakley BR, Quiñones MA, Crawford MS, Jago IA. The validity of isometric strength tests. Personnel Psychology. 1994;47(2):247-274. doi:10.1111/j.1744-6570.1994.tb01724.x | 1 |
| Bailey R, Morley D. Towards a model of talent development in physical education. Sport, Education and Society. 2006;11(3):211-230. doi:10.1080/13573320600813366 | 1 |
| Vaeyens R, Güllich A, Warr CR, Philippaerts R. Talent identification and promotion programmes of olympic athletes. Journal of Sports Sciences. 2009;27(13):1367-1380. doi:10.1080/02640410903110974 | 1 |

*Note: 1* number of citations shows the number within the network within the corresponding field; numbers in brackets show the number of citations of google scholar as a reference number (04.2023).

2 all papers between categories were only cited ones between networks

Table S2. Centrality measures for top 5 articles

| **Ranking** | **Score** | **Category** |  |
| --- | --- | --- | --- |
| **Degree-Centrality** | | | |
| 1 | 143 | sport | Vaeyens R, Lenoir M, Williams AM, Philippaerts RM. Talent identification and development programmes in sport. Sports Medicine. 2008;38(9):703–14. |
| 2 | 88 | sport | Williams AM. Perceptual skill in soccer: Implications for talent identification and development. Journal of sport sciences [Internet]. 2000;18(9):737–50. Available from: http://www.tandf.co.uk/journals |
| 3 | 70 | business | Arthur W, Day EA, Mcnelly TL, Edens PS. A meta-analysis of the criterion-related validity of assesment center dimensions. Personnel Psychology. 2003;56(1):125-153. doi:10.1111/j.1744-6570.2003.tb00146.x |
| 4 | 65 | sport | Vaeyens R, Malina RM, Janssens M, van Renterghem B, Bourgois J, Vrijens J, et al. A multidisciplinary selection model for youth soccer: The Ghent Youth Soccer Project. British Journal of Sports Medicine. 2006 Nov;40(11):928–34. |
| 5 | 52 | sport | Pearson DT, Naughton GA, Torode M. Predictability of physiological testing and the role of maturation in talent identification for adolescent team sports. Journal of Science and Medicine in Sport. 2006 Aug;9(4):277–87. |
| **Indegree-Centrality** | | | |
| 1 | 130 | sport | Vaeyens R, Lenoir M, Williams AM, Philippaerts RM. Talent identification and development programmes in sport. Sports Medicine. 2008;38(9):703–14. |
| 2 | 87 | sport | Williams AM. Perceptual skill in soccer: Implications for talent identification and development. Journal of sport sciences [Internet]. 2000;18(9):737–50. Available from: http://www.tandf.co.uk/journals |
| 3 | 60 | sport | Vaeyens R, Malina RM, Janssens M, van Renterghem B, Bourgois J, Vrijens J, et al. A multidisciplinary selection model for youth soccer: The Ghent Youth Soccer Project. British Journal of Sports Medicine. 2006 Nov;40(11):928–34. |
| 4 | 56 | business | Arthur W, Day EA, Mcnelly TL, Edens PS. A meta-analysis of the criterion-related validity of assesment center dimensions. Personnel Psychology. 2003;56(1):125-153. doi:10.1111/j.1744-6570.2003.tb00146.x |
| 5 | 45 | sport | Pearson DT, Naughton GA, Torode M. Predictability of physiological testing and the role of maturation in talent identification for adolescent team sports. Journal of Science and Medicine in Sport. 2006 Aug;9(4):277–87. |
| **Eigenvector-Centrality** | | | |
| 1 |  | sport | Vaeyens R, Lenoir M, Williams AM, Philippaerts RM. Talent identification and development programmes in sport. Sports Medicine. 2008;38(9):703–14. |
| 2 |  | sport | Williams AM. Perceptual skill in soccer: Implications for talent identification and development. Journal of sport sciences [Internet]. 2000;18(9):737–50. Available from: http://www.tandf.co.uk/journals |
| 3 |  | sport | Vaeyens R, Malina RM, Janssens M, van Renterghem B, Bourgois J, Vrijens J, et al. A multidisciplinary selection model for youth soccer: The Ghent Youth Soccer Project. British Journal of Sports Medicine. 2006 Nov;40(11):928–34. |
| 4 |  | sport | Abbott A, Collins D. Eliminating the dichotomy between theory and practice in talent identification and development: Considering the role of psychology. Journal of Sports Sciences. 2004;22(5):395–408. |
| 5 |  | sport | Pearson DT, Naughton GA, Torode M. Predictability of physiological testing and the role of maturation in talent identification for adolescent team sports. Journal of Science and Medicine in Sport. 2006 Aug;9(4):277–87. |
| **Betweenness-Centrality** | | | |
| 1 |  | business | Robertson IT, Smith M. Personnel selection. J Occupat & Organ Psyc. 2001;74(4):441-472. doi:10.1348/096317901167479 |
| 2 |  | sport | Bergkamp TLG, Niessen ASM, den Hartigh RJR, Frencken WGP, Meijer RR. Methodological issues in soccer talent identification research. Sports Medicine. 2019 Sep 1;49(9):1317–35. |
| 3 |  | sport | Vaeyens R, Lenoir M, Williams AM, Philippaerts RM. Talent identification and development programmes in sport. Sports Medicine. 2008;38(9):703–14. |
| 4 |  | business | Arthur W, Day EA, Mcnelly TL, Edens PS. A meta-analysis of the criterion-related validity of assesment center dimensions. Personnel Psychology. 2003;56(1):125-153. doi:10.1111/j.1744-6570.2003.tb00146.x |
| 5 |  | sport | den Hartigh RJR, Niessen ASM, Frencken WGP, Meijer RR. Selection procedures in sports: Improving predictions of athletes’ future performance. Vol. 18, European Journal of Sport Science. Taylor and Francis Ltd.; 2018. p. 1191–8. |

| Rank | Author | Pub-lications  in articles | fractionized publication | main field | *h-index* | *m-index* | *total citations** | *first publication (earlierst of both databases)* |
| --- | --- | --- | --- | --- | --- | --- | --- | --- |
| 1 | Lievens, F. | 29 | 12,37 | business | 91 | 3,64 | 28.567 | 1998 |
| 2 | Lenoir, M. * | 21 | 3,79 | sport | 51 | 1,82 | 9.277 | 1995 |
| 3 | Fransen, J. | 18 | 3,31 | sport | 31 | 2,82 | 3.661 | 2012 |
| 4 | Vaeyens, R. | 18 | 3,22 | sport | 51 | 2,31 | 12.690 | 2001 |
| 5 | Kleinmann, M. | 17 | 4,26 | business | 42 | 1,27 | 5.101 | 1990 |
| 6 | Pion, J. | 17 | 2,89 | sport | 29 | 0,91 | 3.406 | 1991 |
| 7 | Baker, J. | 15 | 4,57 | sport | 81 | 2,7 | 24.864 | 1993 |
| 8 | Melchers, K.G. | 14 | 3,91 | business | 31 | 1,41 | 3.374 | 2001 |
| 9 | Robertson, S. | 14 | 3,8 | sport | 39 | 3,55 | 4.848 | 2012 |
| 10 | Woods, C.T. | 14 | 2,93 | sport | 29 | 1,38 | 2.554 | 2002 |
| 11 | Philippaerts, R.M. * | 14 | 2,4 | sport | 54 | 1,93 | 9.265 | 1995 |
| 12 | Schorer, J. | 12 | 2,85 | sport | 43 | 1,48 | 6.425 | 1994 |
| 13 | Elferink-Gemser, M.T. | 12 | 2,81 | sport | 50 | 2,63 | 8.870 | 2004 |
| 14 | Conzelmann, A. | 10 | 3,67 | sport | 35 | 1,03 | 3.987 | 1989 |
| 15 | König, C.J. | 10 | 2,95 | business | 46 | 2,19 | 9.145 | 2002 |
| 16 | Till, K. | 10 | 2,55 | sport | 49 | 3,27 | 8.496 | 2008 |
| 17 | Faber, I. | 10 | 2,09 | sport | 17 | 1 | 1.101 | 2006 |
| 18 | Zuber, C. * | 9 | 3,33 | sport | 12 | 1,5 | 310 | 2015 |
| 19 | Thornton, G.C. * | 9 | 2,92 | business | 24 | 0,43 | 2.234 | 1967 |
| 20 | Hoffmann, B.J. | 9 | 2,91 | business | 37 | 1,61 | 13.435 | 2000 |
| 21 | Deprez, D. * | 9 | 1,39 | sport | 19 | 1,72 | 1.208 | 2012 |
| 22 | Sackett, P.R. | 8 | 4,17 | business | 84 | 1,71 | 33.587 | 1974 |
| 23 | Williams, A.M. | 8 | 3,09 | sport | 113 | 3,23 | 54.691 | 1988 |
| 24 | Cobley, S. | 8 | 1,69 | sport | 51 | 2,32 | 10.130 | 2001 |
| 25 | Ones, D.S. | 7 | 2,92 | business | 79 | 2,47 | 34.355 | 1991 |
| 26 | Collins, D. * | 7 | 2,75 | sport | 49 | 1,48 | 8.434 | 1990 |
| 27 | Ingold, P.V. | 7 | 1,89 | business | 12 | 1,5 | 552 | 2015 |
| 28 | Pyne, D.B. | 7 | 1,87 | sport | 95 | 2,02 | 30.159 | 1976 |
| 29 | Visscher, C. * | 7 | 1,63 | sport | 48 | 2,09 | 6883 | 2000 |
| 30 | Roth, P.L. | 7 | 1,59 | business | 56 | 1,47 | 20.643 | 1985 |
| 31 | Raynor, A.J. | 7 | 1,57 | sport | 17 | 0,5 | 1.323 | 1989 |
| 32 | Bennett, K.J. | 7 | 1,44 | sport | 16 | 1,77 | 2.005 | 2014 |
| 33 | Malina, R.M. | 7 | 1,3 | sport | 124 | 1,97 | 73.878 | 1960 |
| 34 | Furnham, A. | 6 | 2,37 | business | 183 | 4,16 | 155.466 | 1979 |
| 35 | Born, M. | 6 | 2,32 | business | 47 | 1,31 | 8.373 | 1987 |
| 36 | Höner, O. | 6 | 2,28 | sport | 27 | 1,08 | 2.430 | 1998 |
| 37 | Anderson, N | 6 | 2,15 | business | 77 | 2,08 | 35.884 | 1986 |
| 38 | Arthur, W. | 6 | 1,92 | business | 52 | 1,37 | 15.343 | 1985 |
| 39 | Goffin, R.D. | 6 | 1,87 | business | 37 | 1,09 | 8.733 | 1988 |
| 40 | Jackson, D.J. * | 6 | 1,73 | business | 14 | 0,66 | 419 | 2002 |

Table S3. Top 40 authors

*Note*: (highest number of databases SCOPUS, GS, and WOS)*

Table S4. Articles not included in Co-Citation Network Analysis (*n* = 47)

| **Article** | **category** |
| --- | --- |
| Arvidsson, J., & Haglund, E. (2019). Jump height as performance indicator for the selection of youth football players to national teams. *The Journal of Sports Medicine and Physical Fitness, 59*(10), 1669-1675. | sport |
| Boccia, G., Cardinale, M., & Brustio, P. R. (2020). World-class sprinters’ careers: Early success does not guarantee success at adult age. *International Journal of Sports Physiology and Performance, 16*(3), 367-374. | sport |
| Bullock, N., Gulbin, J. P., Martin, D. T., Ross, A., Holland, T., & Marino, F. (2009). *Talent identification and deliberate programming in skeleton: Ice novice to Winter Olympian in 14 months. Journal of sports sciences, 27*(4), 397-404. | sport |
| Camacho-Cardenosa, A., Camacho-Cardenosa, M., González-Custodio, A., Martínez-Guardado, I., Timón, R., Olcina, G., & Brazo-Sayavera, J. (2018). Anthropometric and physical performance of youth handball players: *The role of the relative age. Sports, 6*(2), 47. | sport |
| Chytiri, A. P., Filippaios, F., & Chytiris, L. (2018). Hotel recruitment and selection practices: The case of the Greek Hotel Industry. *International Journal of Organizational Leadership, 7*, 324-339. | business |
| Dondolo, V., & Chinyamurindi, W. T. (2018). Impression management within the recruitment interview: Narratives of employees at a South African higher education institution. *SA Journal of Industrial Psychology, 44*(1), 1-7. | business |
| Goto, H., Morris, J. G., & Nevill, M. E. (2019). Influence of biological maturity on the match performance of 8-to 16-year-old, elite, male, youth soccer players. *The Journal of Strength & Conditioning Research, 33*(11), 3078-3084. | sport |
| Gryko, K., Kopiczko, A., Mikołajec, K., Stasny, P., & Musalek, M. (2018). Anthropometric variables and somatotype of young and professional male basketball players. *Sports, 6*(1), 9. | sport |
| Haycraft, J. A., Kovalchik, S., Pyne, D. B., & Robertson, S. (2017). Physical characteristics of players within the Australian Football League participation pathways: a systematic review. *Sports medicine-open, 3*(1), 1-16. | sport |
| Hohmann, A., Siener, M., & He, R. (2018). Prognostic validity of talent orientation in soccer.*German Journal of Exercise and Sport Research, 48*(4), 478-488. | sport |
| Jacob, Y., Spiteri, T., Hart, N. H., & Anderton, R. S. (2018). The potential role of genetic markers in talent identification and athlete assessment in elite sport. *Sports, 6*(3), 88. | sport |
| Kalinski, S. D., Jelaska, I., & Knežević, N. (2017). Age effects among elite male gymnasts. *Acta Kine, 11*(2), 84-89. | sport |
| Koch, T., Gerber, C., & De Klerk, J. J. (2018). The impact of social media on recruitment: Are you LinkedIn?. *SA Journal of Human Resource Management, 16*(1), 1-14. | business |
| Köklü, Y., Arslan, Y., & Alemdaroğlu, U. (2017). Evidence of the relative age effect in youth soccer players from Turkey. *Kinesiologia Slovenica, 23*(2), 33-43. | sport |
| Lance, C. E., Lambert, T. A., Gewin, A. G., Lievens, F., & Conway, J. M. (2004). Revised estimates of dimension and exercise variance components in assessment center postexercise dimension ratings.*Journal of Applied Psychology, 89*(2), 377. | business |
| Landers, R. N., & Marin, S. (2021). Theory and technology in organizational psychology: A review of technology integration paradigms and their effects on the validity of theory. *Annual Review of Organizational Psychology and Organizational Behavior, 8*, 235-258. | business |
| Langer, M., König, C. J., & Fitili, A. (2018). Information as a double-edged sword: The role of computer experience and information on applicant reactions towards novel technologies for personnel selection. *Computers in Human Behavior, 81*, 19-30. | business |
| Langer, M., König, C. J., & Hemsing, V. (2020). Is anybody listening? The impact of automatically evaluated job interviews on impression management and applicant reactions. *Journal of Managerial Psychology*. | business |
| Mahfoozi, A., Salajegheh, S., Ghorbani, M., & Sheikhi, A. (2018). Developing a talent management model using government evidence from a large-sized city, Iran. *Cogent Business & Management, 5*(1), 1449290. | business |
| Marcus, B., Goldenberg, J., Fine, S., Hummert, H., & Traum, A. (2020). Self-presentation in selection settings: The case of personality tests. *Journal of Business and Psychology, 35*(5), 557-571. | business |
| Markovic, G., & Mikulic, P. (2011). Discriminative ability of the yo-yo intermittent recovery test (level 1) in prospective young soccer players. *The Journal of Strength & Conditioning Research, 25*(10), 2931-2934. | sport |
| Medina, A., & Francis, A. J. (2015). What are the characteristics that software development project team members associate with a good project manager?. *Project Management Journal, 46*(5), 81-93. | business |
| Memon, M., Ahmed, F., Qureshi, M. A., & Brohi, N. A. (2018). Effectiveness of psychometric testing in recruitment process. *Journal of Organizational Behavior Research, 3*(1), 293-306. | business |
| Mwila, N. K., & Turay, M. I. S. (2018). Augmenting talent management for sustainable development in Africa. *World Journal of Entrepreneurship, Management and Sustainable Development, 14*(1), 41-49. | business |
| Norjali, R., Mostaert, M., Pion, J., & Lenoir, M. (2018). Anthropometry, physical performance, and motor coordination of medallist and non-medallist young fencers. *Archives of Budo, 14*, 33-40. | sport |
| Nortje, L., Dicks, M., Coopoo, Y., & Savelsbergh, G. J. (2014). Put your money where your mouth is: verbal self-reported tactical skills versus on-line tactical performance in soccer.*International Journal of Sports Science & Coaching, 9*(2), 321-334. | sport |
| Pao, H. W., Lee, C. Y., Chung, P. H., & Wu, H. L. (2018). Hiring decisions on certified manpower: The resource dependence and social contagion views of institutional innovators. *Journal of Advances in Management Research*. | business |
| Poppleton, W. L., & Salmoni, A. W. (1991). Talent identification in swimming.*Journal of Human Movement Studies, 20*(2), 85-100. | sport |
| Prieto-Ayuso, A., Pastor-Vicedo, J. C., & Contreras-Jordán, O. (2017). Content validity and psychometric properties of the nomination scale for identifying football talent (NSIFT): *Application to coaches, parents and players. Sports, 5*(1), 2. | sport |
| Puchert, J. I., Dodd, N., & Viljoen, K. L. (2017). Secondary education as a predictor of aptitude: Implications for selection in the automotive sector. *SA Journal of Industrial Psychology, 43*(1), 1-13. | business |
| Rajaprasad, S. V. S. (2018). Selection of safety officers in an indian construction organization by using grey relational analysis. *Independent Journal of Management & Production, 9*(1), 97-110. | business |
| Ré*, A. H., Cattuzzo, T. M., Santos, F. M., & Monteiro, C. B. (2014). Anthropometric characteristics, field test scores and match-related technical performance in youth indoor soccer players with different playing status. *International Journal of Performance Analysis in Sport, 14*(2), 482-492. | sport |
| Schmid, M. J., Conzelmann, A., & Zuber, C. (2021). Patterns of achievement-motivated behavior and performance as predictors for future success in rowing: A person-oriented study. *International journal of sports science & coaching, 16*(1), 101-109. | business |
| Silva, M. C., Figueiredo, A. J., Simoes, F., Seabra, A., Natal, A., Vaeyens, R., ... & Malina, R. M. (2010). Discrimination of u-14 soccer players by level and position.*International journal of sports medicine, 31*(11), 790-796. | sport |
| Slavić, A., Bjekić, R., & Berber, N. (2017). The role of the internet and social networks in recruitment and selection process. *Strategic Management-International Journal of Strategic Management and Decision Support Systems in Strategic Management, 23*(3). | business |
| Smither, J. W., Reilly, R. R., Millsap, R. E., AT&T, K. P., & Stoffey, R. W. (1993). Applicant reactions to selection procedures.*Personnel psychology, 46*(1), 49-76. | business |
| Till, K., Cobley, S., O’Hara, J., Brightmore, A., Cooke, C., & Chapman, C. (2011). Using anthropometric and performance characteristics to predict selection in junior UK Rugby League players. *Journal of Science and Medicine in Sport, 14*(3), 264-269. | sport |
| Till, K., Cobley, S., O’Hara, J., Chapman, C., & Cooke, C. (2013). A longitudinal evaluation of anthropometric and fitness characteristics in junior rugby league players considering playing position and selection level. *Journal of Science and Medicine in Sport, 16*(5), 438-443. | sport |
| Till, K., Morley, D., O’Hara, J., Jones, B. L., Chapman, C., Beggs, C. B., ... & Cobley, S. (2017). A retrospective longitudinal analysis of anthropometric and physical qualities that associate with adult career attainment in junior rugby league players. *Journal of science and medicine in sport, 20*(11), 1029-1033. | sport |
| Till, K., Scantlebury, S., & Jones, B. (2017). Anthropometric and physical qualities of elite male youth rugby league players. *Sports Medicine, 47*(11), 2171-2186. | sport |
| Schorer, J., Rienhoff, R., Fischer, L., & Baker, J. (2017). Long-term prognostic validity of talent selections: comparing national and regional coaches, laypersons and novices. *Frontiers in psychology, 8*, 1146. | sport |
| Schorer, J., Faber, I., Koopmann, T., Büsch, D., & Baker, J. (2020). Predictive value of coaches’ early technical and tactical notational analyses on long-term success of female handball players. *Journal of Sports Sciences, 38*(19), 2208-2214. | sport |
| Scullen, S. E., & Meyer, B. C. (2014). More applicants or more applications per applicant? A big question when pools are small.*Journal of Management, 40*(6), 1675-1699. | business |
| Tlaiss, H. (2020). Exploring talent management in practice: an Arab country-specific empirical investigation. Employee Relations: *The International Journal*. | business |
| Tziner, A., Ronen, S., & Hacohen, D. (1993). A four‐year validation study of an assessment center in a financial corporation.*Journal of Organizational Behavior, 14*(3), 225-237. | business |
| Waheed, A., & Yang, J. (2019). Effect of Prejudice and References on Employee Selection Process: Empirical Evidence from Pakistan. *Global Business Review, 20*(6), 1344-1360. | business |
| Wilson, R. S., Smith, N. M., Bedo, B. L. S., Aquino, R., Moura, F. A., & Santiago, P. R. P. (2020). Technical skill not athleticism predicts an individual’s ability to maintain possession in small-sided soccer games. *Science and Medicine in Football, 4*(4), 305-313. | sport |
